# Supplementary material
Source: PubMed Central journal article supplement (PMC6320286)
Supplement: NIHMS999098-supplement-1.pdf [file NIHMS999098-supplement-1.pdf]

## SUPPLEMENTAL INFORMATION

**Table S1: Baseline values for experimental mouse groups**

| <b>Weight partial SSP Injury</b> |             |
|----------------------------------|-------------|
| Overall                          | 23.80±4.00g |
| Female                           | 21.12±2.48g |
| Male                             | 26.77±3.18g |

| <b>Weight SSP Repair</b> |             |
|--------------------------|-------------|
| Overall                  | 25.14±3.64g |
| Female                   | 23.52±2.41  |
| Male                     | 28.09±3.44g |

**Figure S1:** Region of interest enclosing the humeral head for bone mineral density calculations.

**Figure S2:** Lineage tracing using Sox9CreERT2 at d14 after partial tear injury. Yellow arrow indicate scar region. Scalebars: 100um.

**Figure S3:** Immunostaining for  $\alpha$ SMA only labeled blood vessels with no labeling in epitenon or bursa and discrete staining in muscle and bone marrow. Yellow arrow highlights enthesis scar. Region of interest defined by dashed outline. Scalebars: 100um.

**Figure S4:** Bone mineral density was not significantly different between sham control and partial tear injury; there was also no significant difference between sex.
